# Supplementary material for: Metal-dependent activity control of a compact-sized 8–17 DNAzyme based on metal-mediated unnatural base pairing
Source: Royal Society of Chemistry journal article supplement (doi:10.1039/d3cc05520e), 2023-12-04
Supplement: d3cc05520e1.pdf [file d3cc05520e1.pdf]

*Electronic Supplementary Information*

**Metal-dependent activity control of a compact-sized 8-17  
DNAzyme based on metal-mediated unnatural base pairing**

Yusuke Takezawa,\* Lingyun Hu, Takahiro Nakama and Mitsuhiko Shionoya\*

*Department of Chemistry, Graduate School of Science, The University of Tokyo,  
7-3-1 Hongo, Bunkyo-ku, Tokyo 113-0033, Japan*

**Table of Contents**

|                                |           |
|--------------------------------|-----------|
| <b>1. Experimental methods</b> | <b>S2</b> |
| <b>2. Supporting figures</b>   | <b>S3</b> |
| <b>3. Reference</b>            | <b>S5</b> |

## 1. Experimental methods

**Materials and equipment.** All the natural DNA strands and 6-carboxyfluorescein (FAM)-labeled substrates containing a riboadenosine (rA) were purchased from Japan Bio Service Co., Ltd. (Saitama, Japan) at HPLC purification grade. A DNAzyme strand (**DzIm**) containing a 4-carboxyimidazole (**Im<sup>C</sup>**) nucleotides was synthesized on an automated DNA synthesizer and purified by reverse-phase HPLC according to the reported procedure.<sup>[S1]</sup> The **DzIm** strand was characterized by matrix assisted laser desorption ionization time-of-flight (MALDI-TOF) mass spectrometry on Autoflex III (Bruker) using a mixture of 3-hydroxypicolinic acid (3-HPA) and ammonium citrate as a matrix. Metal sources (CuSO<sub>4</sub>·5H<sub>2</sub>O (99.5% purity), Hg(ClO<sub>4</sub>)<sub>2</sub>·3H<sub>2</sub>O (99%), AgNO<sub>3</sub> (99.8%), Pb(OAc)<sub>2</sub>·3H<sub>2</sub>O (99.9%)) were purchased from FUJIFILM Wako Pure Chemical Industries. Denaturing polyacrylamide gel electrophoresis (PAGE) was carried out with 20% polyacrylamide gel containing 7 M urea. The gels were imaged and analyzed using Gel Doc EZ Imager and Image Lab software (Bio-Rad).

**RNA-cleaving reaction by Im<sup>C</sup>-modified DNAzyme (DzIm).** DNAzyme strands were annealed (85 °C → 25 °C, 1.0 °C/min) in a reaction buffer (50 mM HEPES buffer (pH 7.5), 100 mM NaCl, 10 μM Pb(OAc)<sub>2</sub>) in the absence or presence of CuSO<sub>4</sub> (1.0 equiv). The concentrations of Pb<sup>II</sup> ions were set to 10 μM to reduce unintended interactions between Pb<sup>II</sup> and **Im<sup>C</sup>** nucleobases. The DNAzyme reactions were initiated by the addition of a FAM-labeled substrate strand. The final concentration of each component was as follows: [DNAzyme] = 1.0 μM, [substrate] = 10 μM, [CuSO<sub>4</sub>] = 0 or 1.0 μM. After incubation at 25 °C, an aliquot of the sample solution was taken at the designated time points. The reaction was stopped by the addition of a loading buffer (5.25 M urea, 1.25 mM EDTA, 7.5% glycerol), and the mixtures were stored at -28 °C until the time course was completed. The cleavage of the substrate was analyzed by denaturing PAGE. The fractions of the cleaved substrate (*F*) were calculated as follows:

$$F (\%) = I_c / (I_c + I_u) \times 100,$$

where *I<sub>c</sub>* and *I<sub>u</sub>* are the band intensities of the cleaved product and the uncleaved substrate, respectively. The apparent first-order rate constants (*k<sub>obs</sub>*) were calculated from the initial reaction rates, which were determined from the time points when *F* was less than 20%.

**RNA-cleaving reactions by DNAzymes DzT and DzC.** DNAzyme strands were annealed (85 °C → 25 °C, 1.0 °C/min) in a reaction buffer (50 mM HEPES buffer (pH 7.5), 100 mM NaNO<sub>3</sub>, 10 μM Pb(OAc)<sub>2</sub>) in the absence or presence of Hg(ClO<sub>4</sub>)<sub>2</sub> or AgNO<sub>3</sub> (1.0 equiv). Note that NaCl

was replaced with  $\text{NaNO}_3$  in the standard reaction buffer to prevent the precipitation of  $\text{HgCl}_2$  and  $\text{AgCl}$ . The following procedures are the same as that for **DzIm**. The final concentration of each component was as follows:  $[\text{DNAzyme}] = 1.0 \mu\text{M}$ ,  $[\text{substrate}] = 10 \mu\text{M}$ ,  $[\text{Hg}(\text{ClO}_4)_2] = [\text{AgNO}_3] = 0$  or  $1.0 \mu\text{M}$ .

**Cu<sup>II</sup> titration experiment with DzIm DNAzyme.** The overall procedures are the same as the DNAzyme reactions described above. The final concentration of each component was as follows:  $[\text{DNAzyme}] = 1.0 \mu\text{M}$ ,  $[\text{substrate}] = 10 \mu\text{M}$ ,  $[\text{CuSO}_4] = 0, 0.5, 1.0, 2.0,$  or  $3.0 \mu\text{M}$ .

**CD spectroscopy.** The samples were prepared by combining an equimolar amount of the DNAzyme (8-17 DNAzyme or **DzIm**) and an uncleavable DNA substrate that contains a dA nucleotide instead of the scissile rA, and annealed prior to the measurements ( $85 \text{ }^\circ\text{C} \rightarrow 4 \text{ }^\circ\text{C}$ ,  $1.0 \text{ }^\circ\text{C}/\text{min}$ ). The concentrations of each component were as follows:  $[\text{DNAzyme}] = 1.0 \mu\text{M}$ ,  $[\text{substrate}] = 1.0 \mu\text{M}$ ,  $[\text{CuSO}_4] = 0$  or  $3.0 \mu\text{M}$ . The CD spectra were recorded on a JASCO J-820 spectropolarimeter with 10-time accumulation using a path length of 0.5 cm at  $4 \text{ }^\circ\text{C}$ . The spectra were smoothed using a simple moving average smoothing program.

## 2. Supporting figures

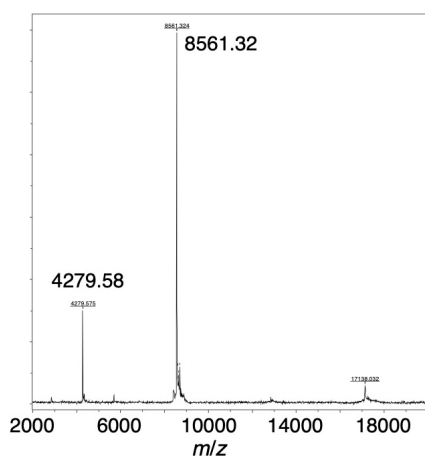

**Figure S1.** MALDI-TOF mass spectrum of the synthesized  $\text{Im}^{\text{C}}$ -modified 8-17 DNAzyme (**DzIm**). Negative mode. Observed: 8561.32; calcd for  $[\text{M} - \text{H}]^-$ : 8560.33.

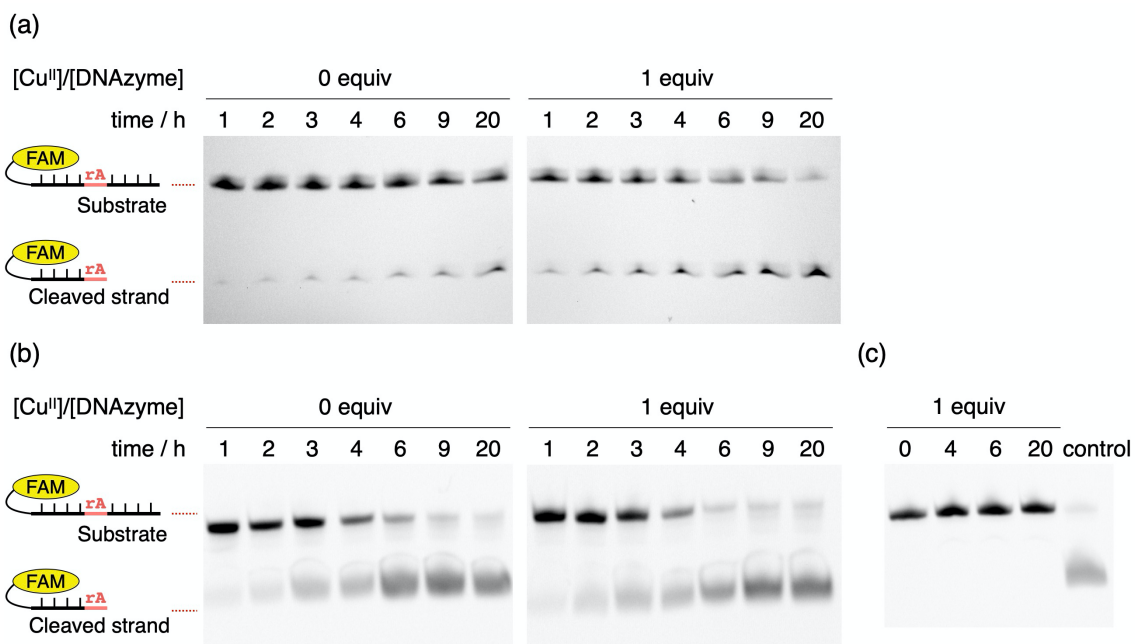

**Figure S2.** Denaturing polyacrylamide gel electrophoresis (PAGE) of the RNA-cleaving reactions (a) catalyzed by the **Im<sup>C</sup>**-modified 8-17 DNAzyme (**DzIm**), (b) catalyzed by the original 8-17 DNAzyme, and (c) without DNAzymes. [DNAzyme] = 1.0  $\mu$ M, [substrate] = 10  $\mu$ M in 50 mM HEPES (pH 7.5), 100 mM NaCl, 0.01 mM Pb(OAc)<sub>2</sub>, 25 °C. 20% polyacrylamide gel containing 7 M urea, detected by FAM fluorescence. The results are summarized in Fig. 3 in the main text.

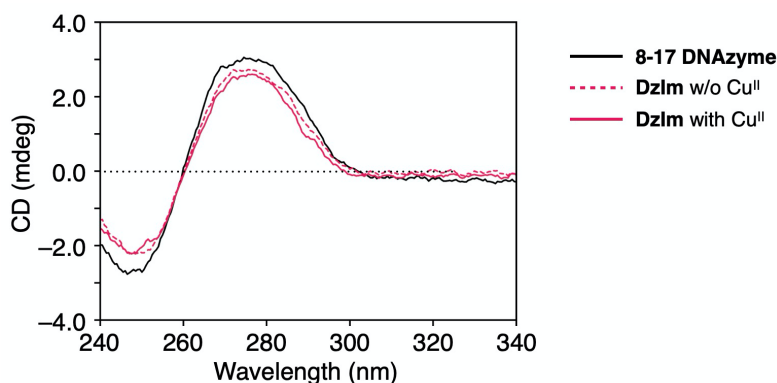

**Figure S3.** CD spectra of 8-17 DNAzyme and **DzIm** in the presence of an uncleavable DNA substrate containing a dA instead of the scissile rA. [DNAzyme] = 1.0  $\mu$ M, [DNA substrate] = 1.0  $\mu$ M, [Cu<sup>II</sup>] = 0 or 1.0  $\mu$ M in 50 mM HEPES buffer (pH 7.5), 100 mM NaCl, 0.01 mM Pb(OAc)<sub>2</sub>, *l* = 0.5 cm, 4 °C.

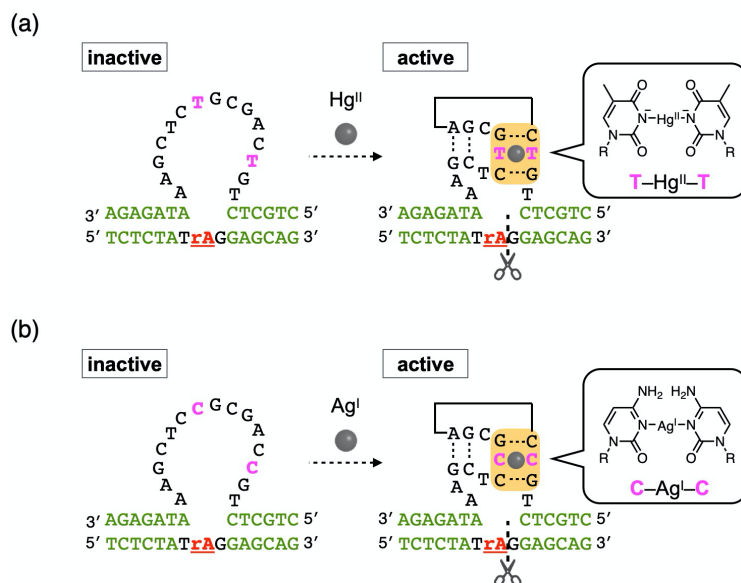

**Figure S4.** Molecular design of  $\text{Hg}^{\text{II}}$ - and  $\text{Ag}^{\text{I}}$ -responsive 8-17 DNazymes containing a  $\text{T-Hg}^{\text{II}}\text{-T}$  or a  $\text{C-Ag}^{\text{I}}\text{-C}$  base pair (**DzT** and **TzC**, respectively). **rA** = adenine ribonucleotide at the cleavage site. Plausible secondary structures for both active and inactive states are shown.

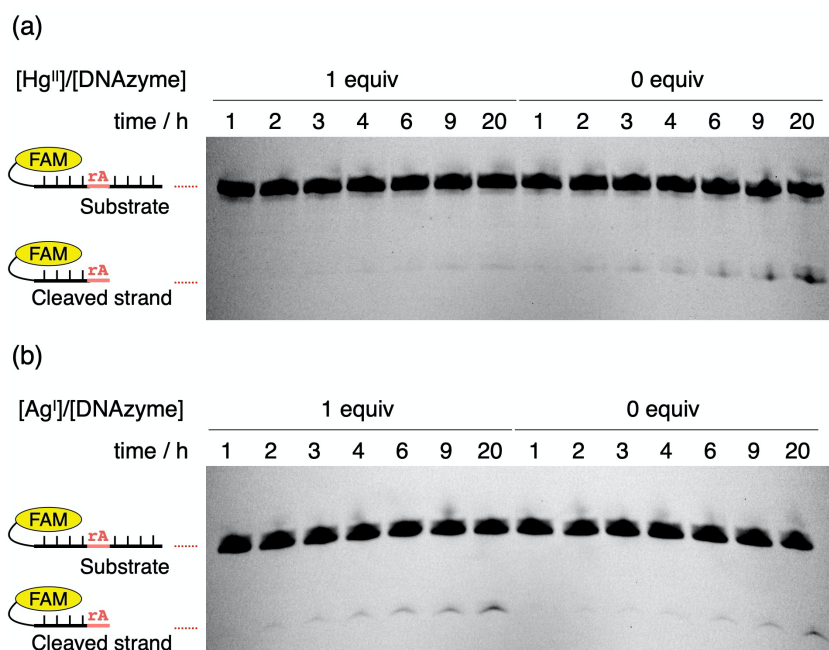

**Figure S5.** Denaturing polyacrylamide gel electrophoresis (PAGE) of the RNA-cleaving reactions catalyzed by the DNazymes modified (a) with a  $\text{T-T}$  base pair (**DzT**) and (b) with a  $\text{C-C}$  base pair (**DzC**). [DNAzyme] = 1.0  $\mu\text{M}$ , [substrate] = 10  $\mu\text{M}$  in 50 mM HEPES (pH 7.5), 100 mM  $\text{NaNO}_3$ , 0.01 mM  $\text{Pb}(\text{OAc})_2$ , 25  $^\circ\text{C}$ . 20% polyacrylamide gel containing 7 M urea, detected by FAM fluorescence. The results are summarized in Fig. 4b in the main text.

### 3. Reference

S1. Y. Takezawa, L. Hu, T. Nakama and M. Shionoya, *Angew. Chem., Int. Ed.*, 2020, **59**, 21488–21492.
